# Supplementary material for: The RNA-binding protein HuR is a negative regulator in adipogenesis
Source: PubMed Central journal article supplement (PMC6954112; doi:10.1038/s41467-019-14001-8), 2020-01-10
Supplement: 41467_2019_14001_MOESM1_ESM.pdf [file 41467_2019_14001_MOESM1_ESM.pdf]

## **Supplementary Information**

The RNA-binding protein HuR is a negative regulator in adipogenesis

Siang et al.

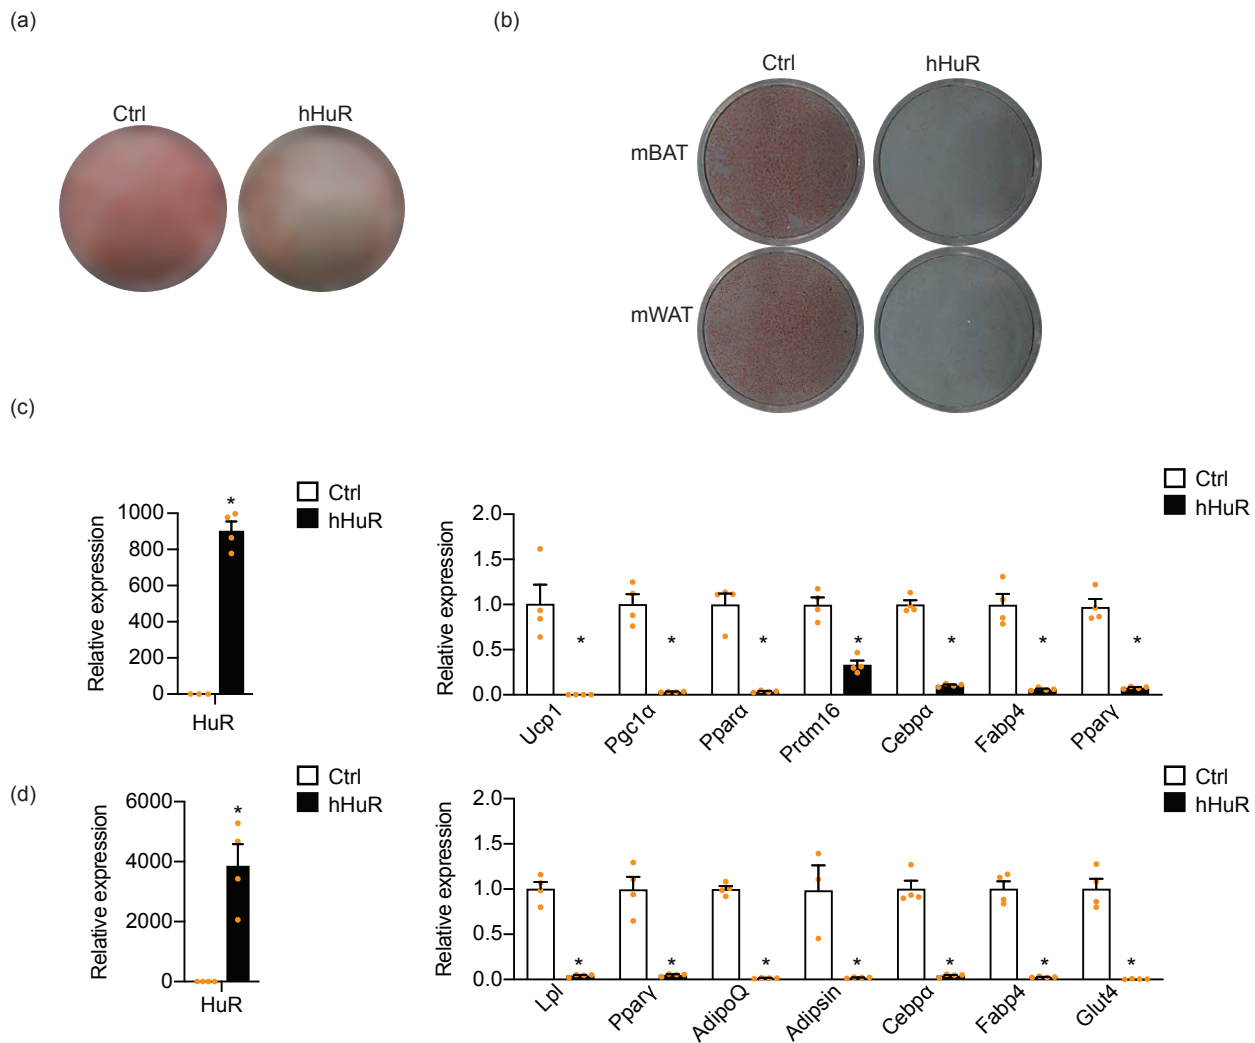

**Supplementary Fig.1 Human HuR overexpression inhibits the differentiation of mouse adipocytes.**

(a) Retroviral overexpression of Human HuR in primary white preadipocytes, followed by induction of differentiation for 14 days. Oil red O staining was conducted to stain the lipid contents. (b) Oil red O staining for mouse brown adipocytes (Upper) or white adipocytes (Lower) overexpressing human HuR. (c) Real-time PCR to examine HuR (left) and marker gene expression (right) in brown adipocyte culture expressing human HuR after 5 days of differentiation. n=4 per group. (d) Similar as in (c), but in primary white adipocyte culture. n=4 per group, Error bars are mean  $\pm$  SEM, Statistical significance was determined by Student's *t*-test; \*p<0.05.

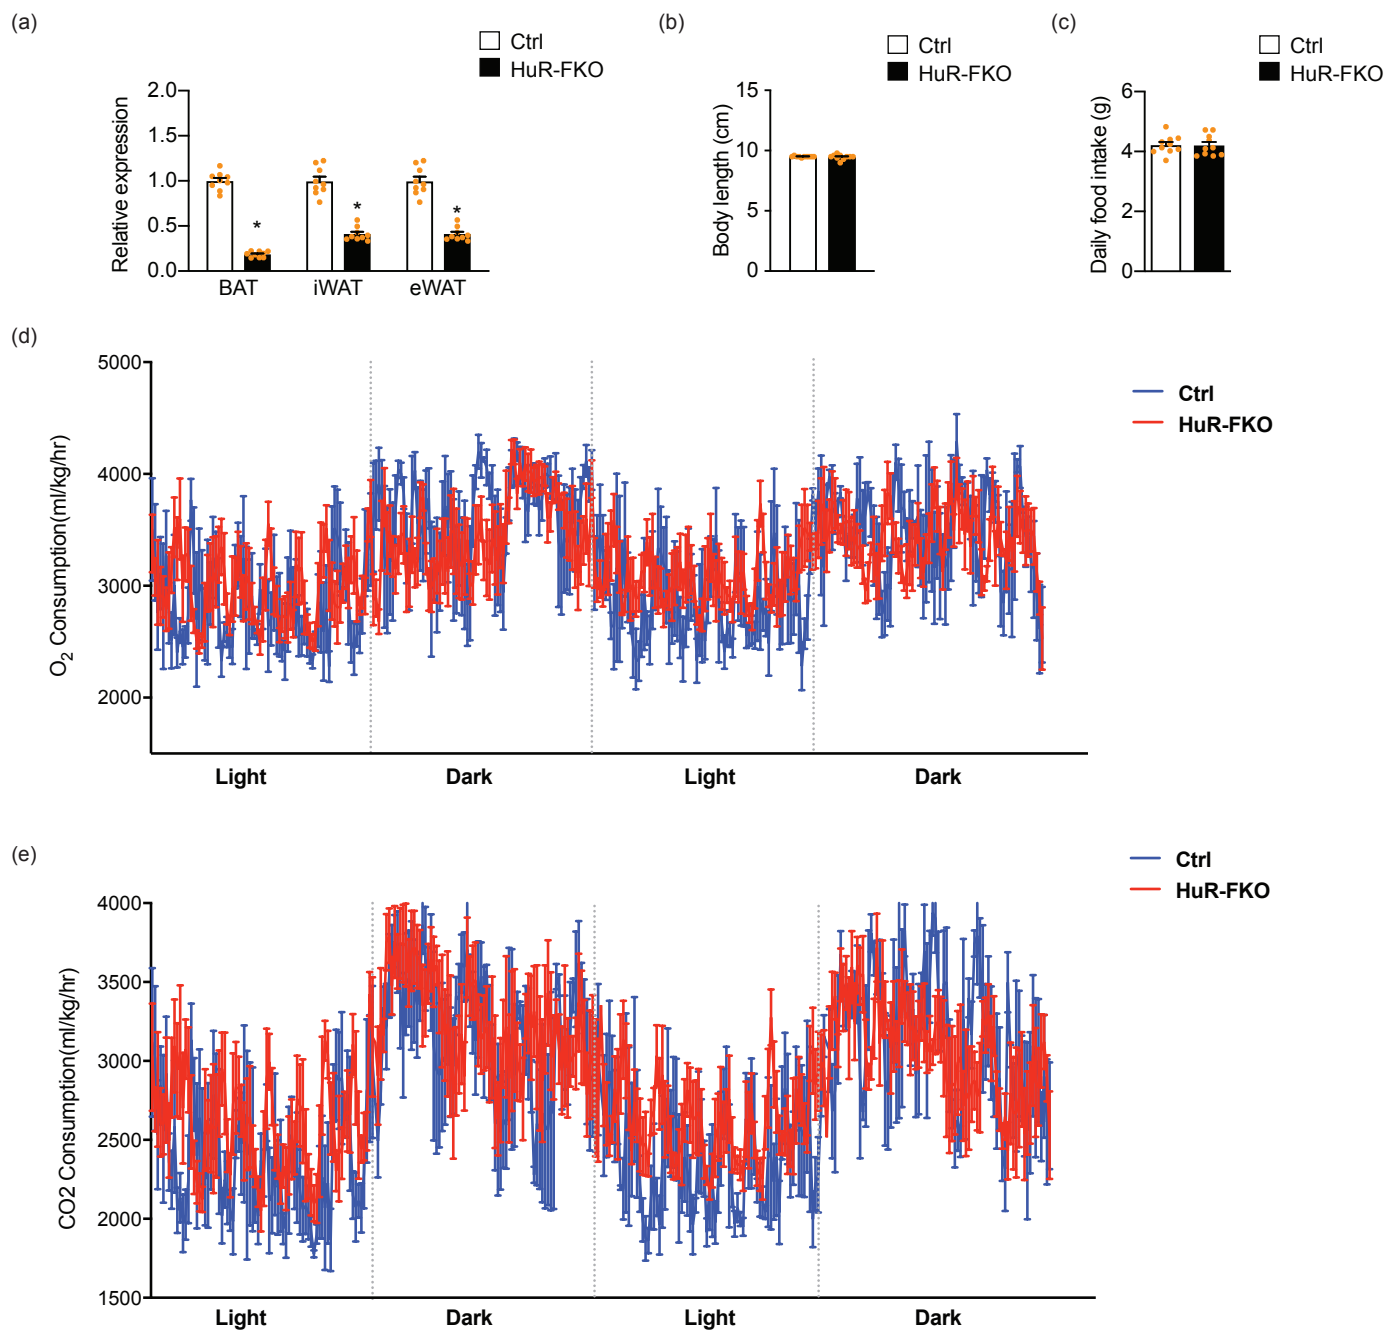

**Supplementary Fig.2 Adipose-selective deletion of HuR doesn't affect animals' body weight, food intake and oxygen consumption.** (a) Real-time PCR to examine HuR expression in BAT, iWAT and eWAT of HuR-FKO and control mice. n=9 per group. (b) Body length of 3-month-old male HuR-FKO and control mice. n=10 per group. (c) Daily food intake of 3-month-old male HuR-FKO and control mice. n=10 per group. (d-e) Oxygen consumption in the control and HuR-FKO mice measured in CLAMS cages over 48 hours period (Ctrl: n=3; HuR-FKO: n=5), Error bars are mean ± SEM, Statistical significance was determined by Student's *t*-test; \**p*<0.05.

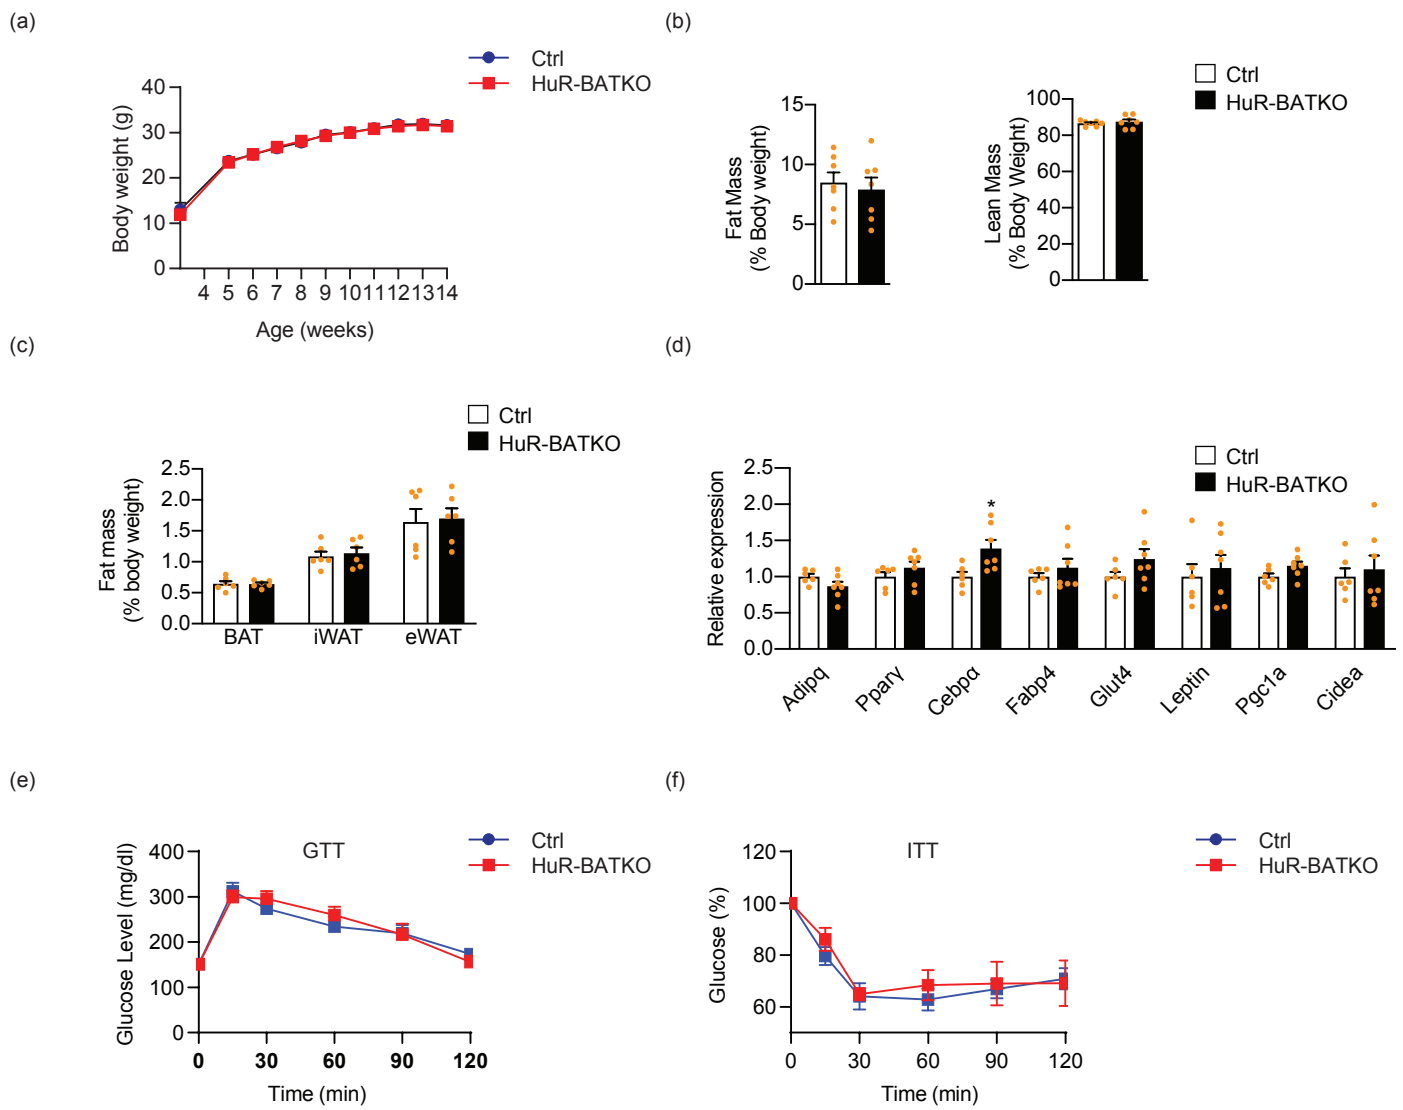

**Supplementary Fig.3 Deletion of HuR in BAT doesn't affect animals' body weight and fat mass.**

(a) Growth curves of HuR-BATKO and Control male mice on chow diet. (Ctrl: n=8; HuR-BATKO: n=7). (b) In vivo body composition by EcoMRI of fat mass (left) and lean mass (right) in 4-month-old male HuR-BATKO and control littermates. n=7 per group (c) The organ weights of BAT, iWAT and eWAT in 4-month-old HuR-BATKO and Control littermates were normalized as a percentage of total body weight (n=6 per group). (d) Real-time PCR analysis of marker gene expression in eWAT (Ctrl: n=6; HuR-BATKO: n=7). (e) Blood glucose levels during glucose tolerance test (GTT) and (f) Insulin tolerance test (ITT) of HuR-BATKO and control littermates (Ctrl: n=8; HuR-BATKO: n=7). Error bars are mean  $\pm$  SEM, Statistical significance was determined by Student's *t*-test; \*p<0.05.

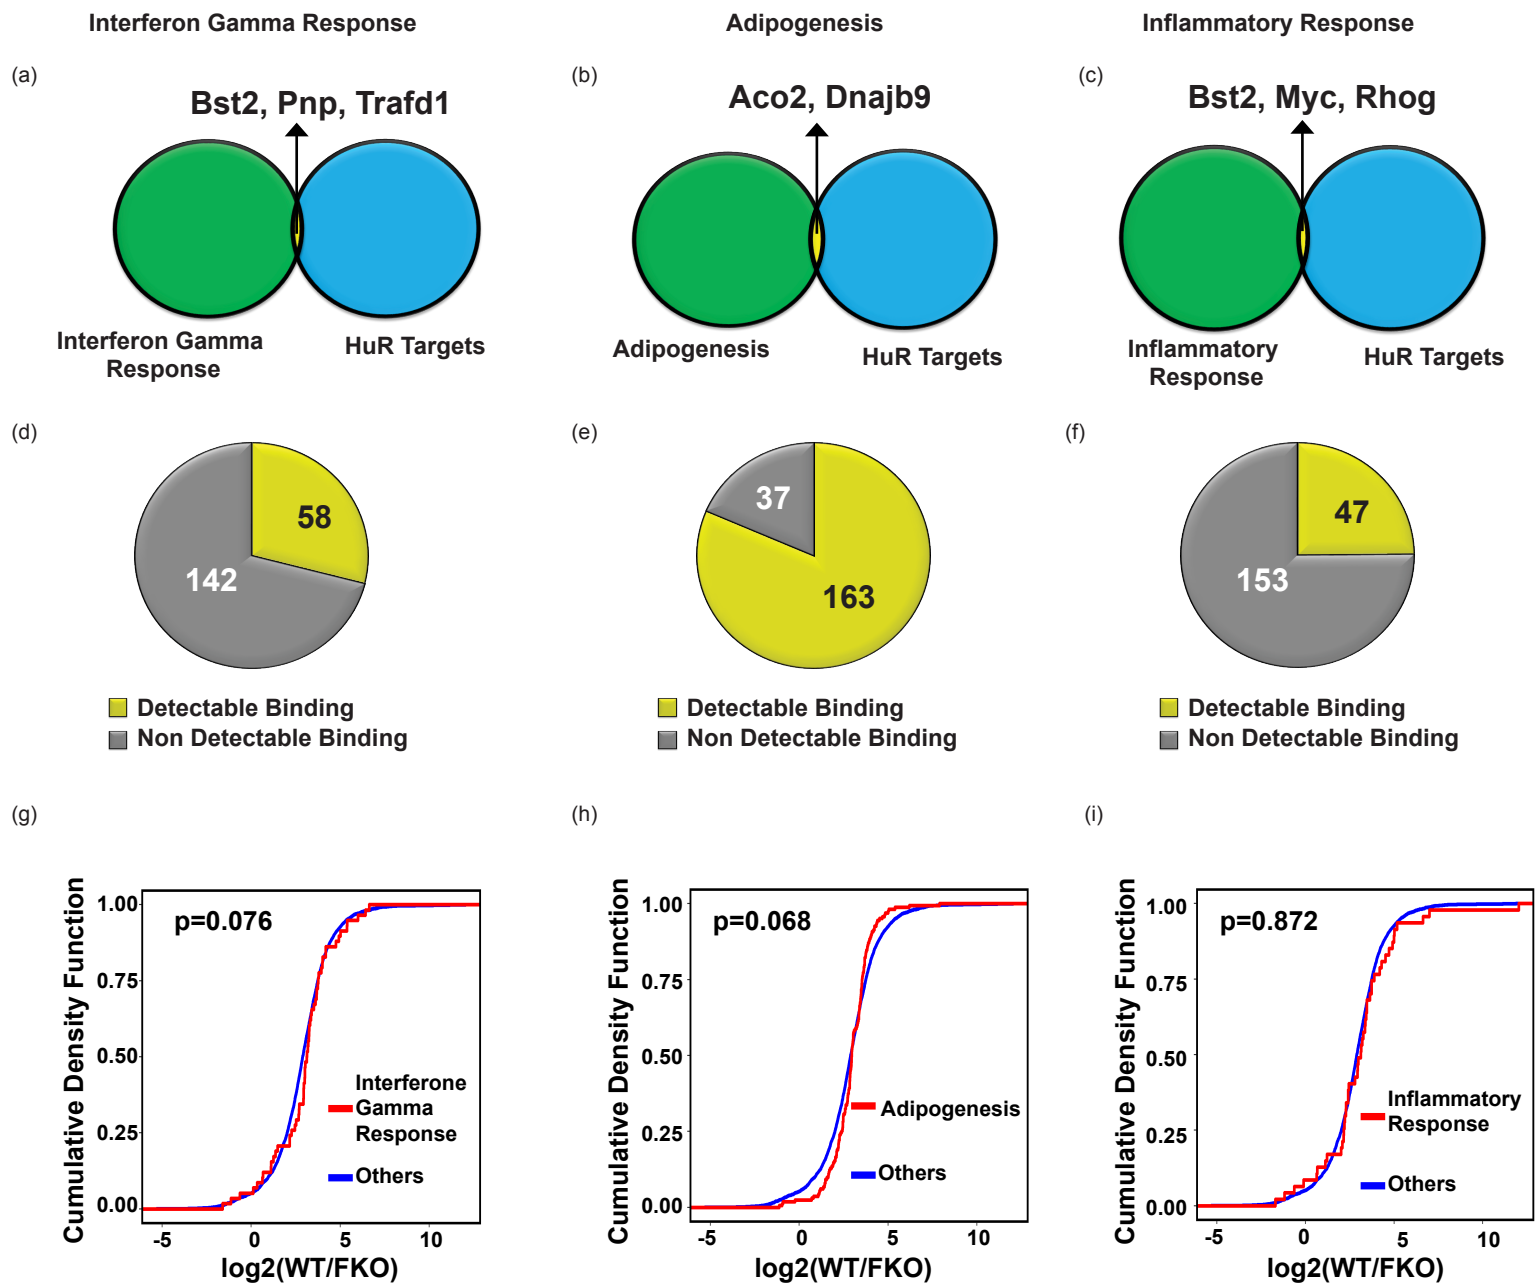

**Supplementary Fig.4 Overlaps of the HuR targets with the genes in the GSEA.**

(a-c) Overlaps of HuR targets with downloaded MSigDB reference gene sets of (a) Hallmark\_Interferon Gamma Response, (b) Hallmark\_Adipogenesis and (c) Hallmark\_Inflammatory Response. (c-d) Proportion of genes within reference gene sets of (d) Hallmark\_Interferon Gamma Response, (e) Hallmark\_Adipogenesis and (f) Hallmark\_Inflammatory Response with detectable HuR binding. (g-i) Cumulative density functions of the genes with detectable HuR binding identified from (d-f) for (g) Hallmark\_Interferon Gamma Response, (h) Hallmark\_Adipogenesis and (i) Hallmark\_Inflammatory Response.

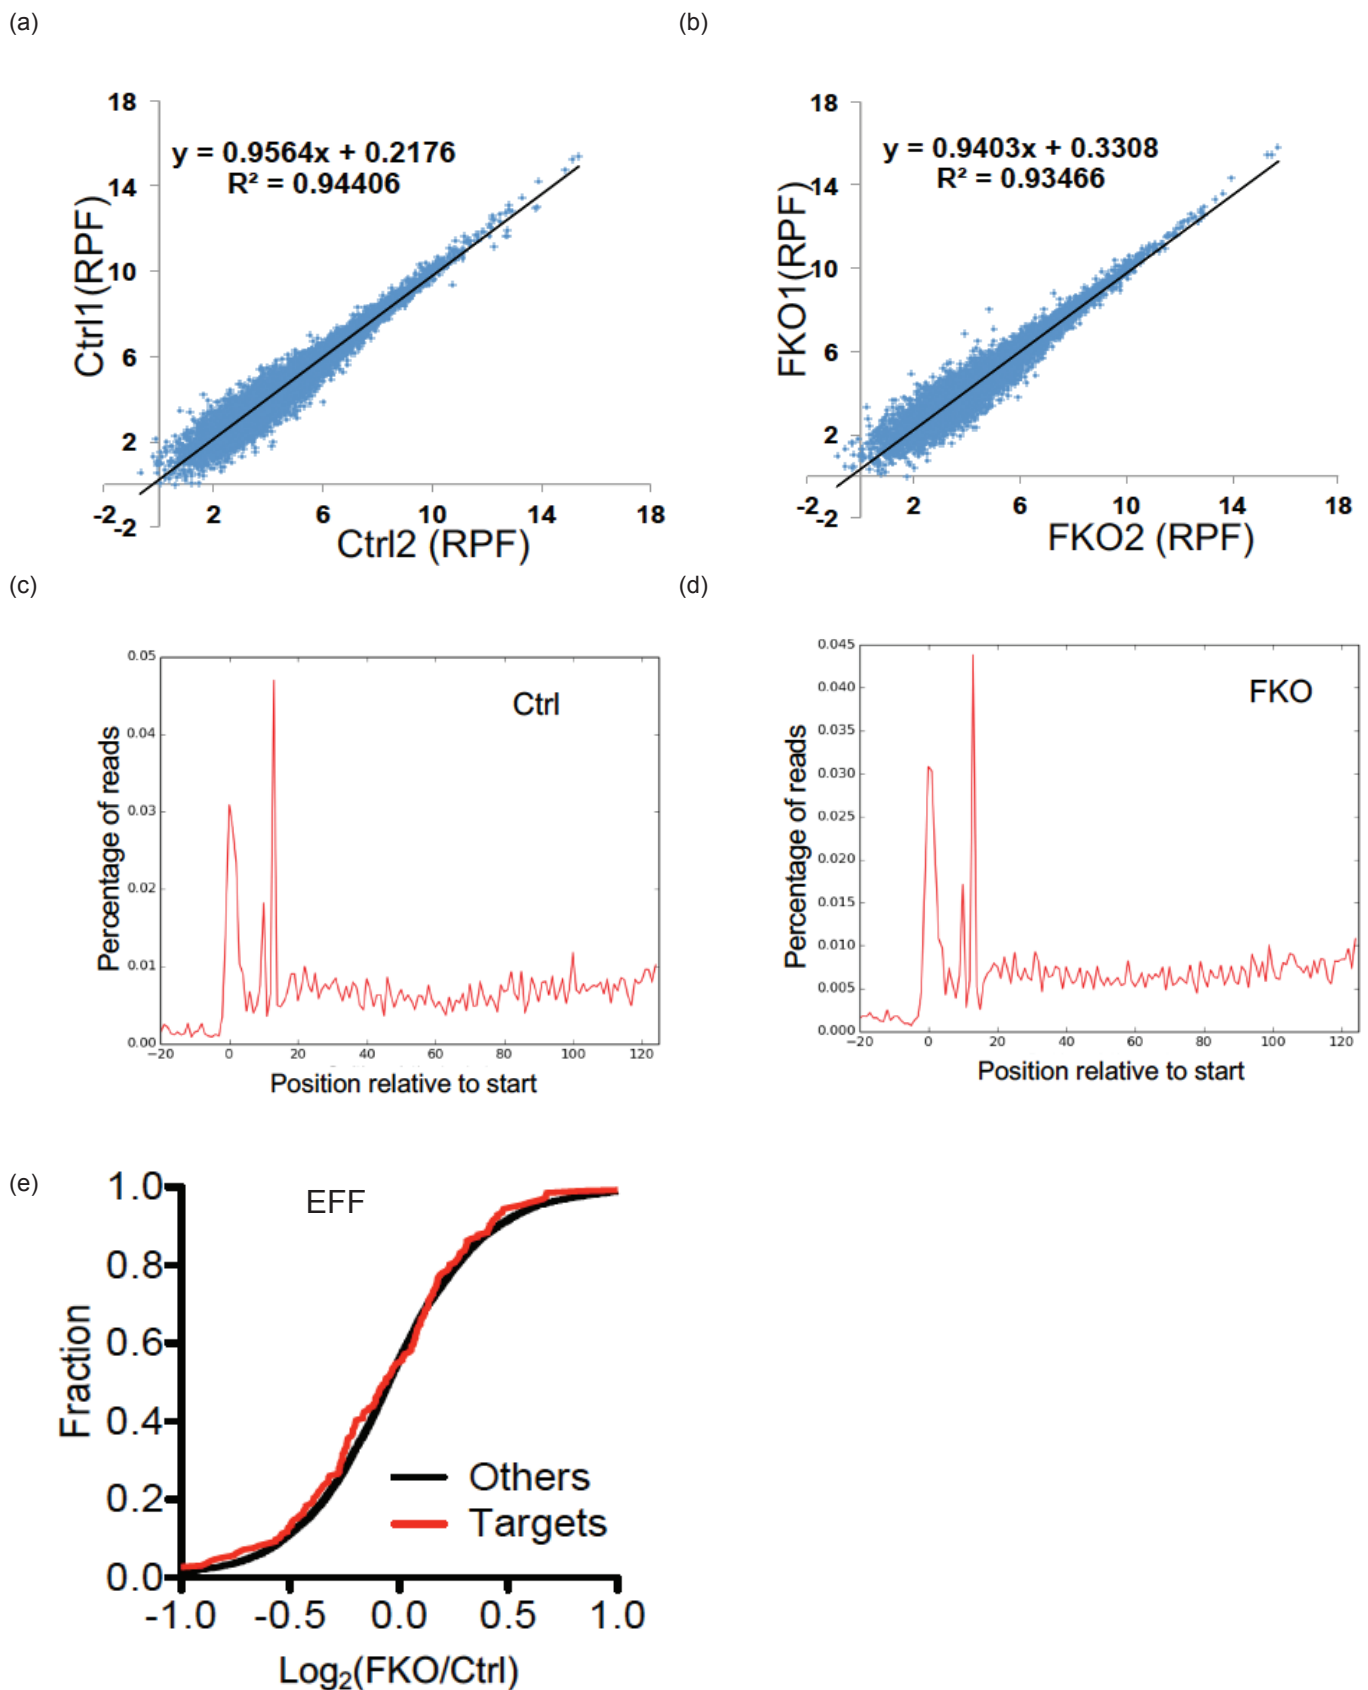

**Supplementary Fig.5 Ribosome profiling analysis of the effect of HuR knockout in eWAT.**

(a, b) Correlation of the ribosome protected fragments (RPF) between the duplicate samples in (a) Ctrl and (b) HuR-FKO eWATs. (c-d) Metagene analysis of translation initiation and termination. Average ribosome footprint density profiles of all the detectable mRNAs in eWAT from 6-weeks old (c) Ctrl and (d) FKO mice are aligned at their start codon and stop codon. (e) The cumulative fraction of the translational efficiency (RPF/FPKM) fold changes between FKO and Ctrl eWAT samples for HuR targets and other genes.

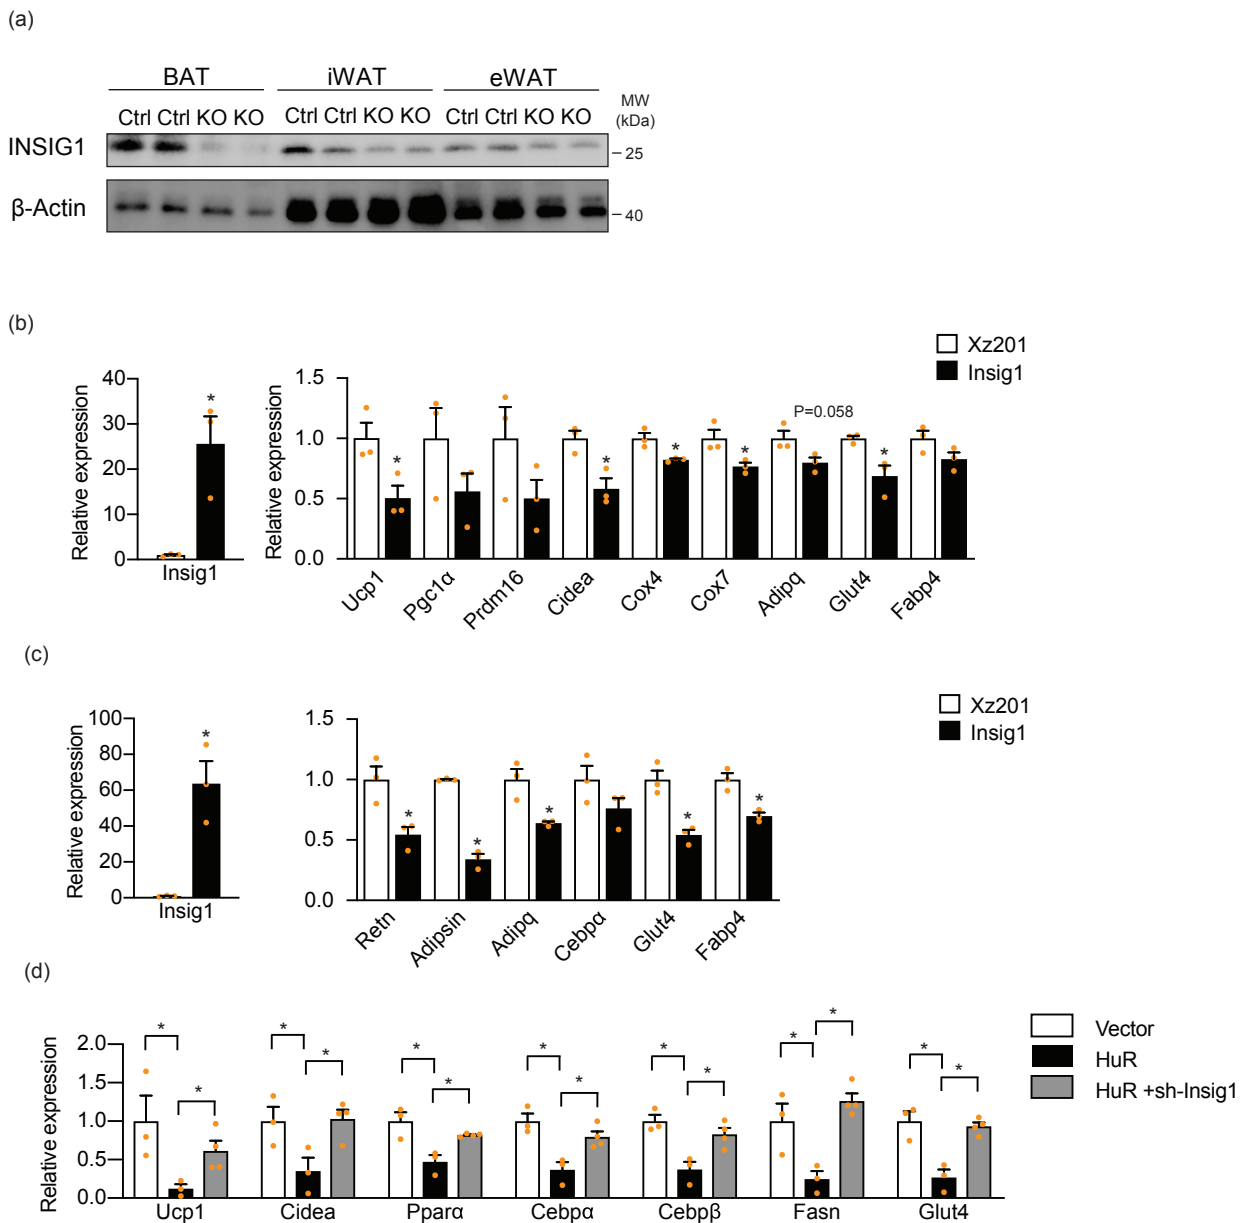

### Supplementary Fig.6 Insig1 is a negative regulator in adipogenesis.

(a) Western blot analysis of *insig1* expression in different adipose depots of Ctrl and HuR-FKO mice. (b) Retroviral overexpression of Xz201 (control vector) or *insig1* in primary brown preadipocytes, followed by induction of differentiation for 5 days. Real-time PCR was conducted to examine *Insig1* (left) and marker gene expression (right).  $n=3$  per group. (c) Similar as in (b), but in primary white adipocyte culture.  $n=3$  per group. (d) Retroviral overexpression of HuR and knockdown of *insig1* in primary white preadipocytes, followed by induction of differentiation. Marker genes were examined by real-time PCR at day 5 (Vector:  $n=3$ ; HuR overexpression:  $n=3$ ; HuR+sh-*Insig1*:  $n=4$ ). The error bars are mean  $\pm$  SEM, Statistical significance was determined by Student's *t*-test; \* $P<0.05$ .

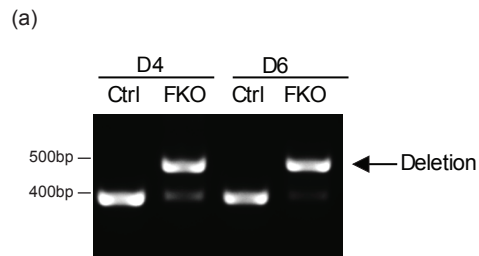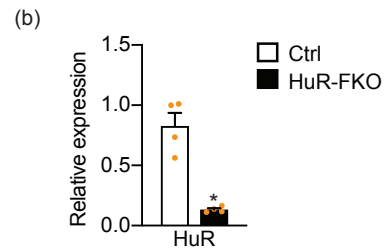

**Supplementary Fig.7 Deletion efficiency of HuR in FKO-HuR adipocyte culture *in vitro*.**

(a) Subcutaneous WAT preadipocytes were isolated from FKO-HuR and control mice for *in vitro* differentiation. PCR analysis of genomic DNA from white adipocytes at Day 4 and Day 6 indicated HuR deletion efficiency. (b) Real-time PCR to examine the expression level of HuR in the control and HuR knockout adipocyte culture. n=4 per group. Error bars are mean ± SEM, Statistical significance was determined by Student's *t*-test; \*p<0.05.



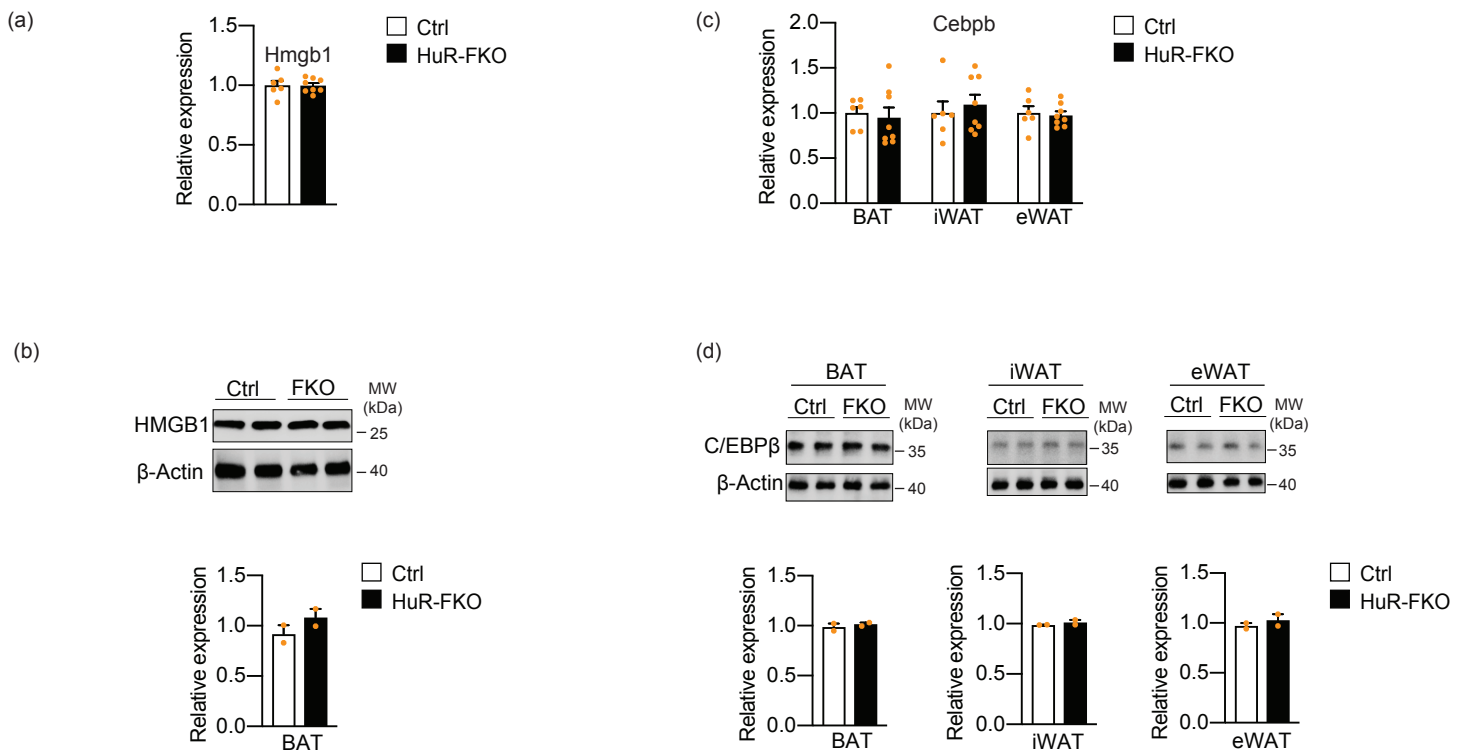

**Supplementary Fig.8 The expression of two previously reported targets in HuR-FKO mice.**

(a) The expression of Hmgb1 in BAT of HuR-FKO and control mice was examined by Real-time PCR (Ctrl: n=6; HuR-BATKO: n=8). (b) The western blot analysis (top) and quantification of the western blot for HMGB1 in BAT of control and knockout animals. The expression of HMGB1 is normalized to β-actin expression and their relative expression is shown (bottom) (n=2). The experiments were repeated twice using different animals. (c) The expression of Cebpb in BAT, iWAT and eWAT of HuR-FKO and control mice was examined by Real-time PCR (Ctrl: n=6; HuR-BATKO: n=8) and (d) Western blot (top). The expression of C/EBPβ is normalized to β-actin expression and their relative expression is shown (bottom) (n=2). The experiments were repeated at least twice using different animals. Error bars are mean ± SEM, Statistical significance was determined by Student's *t*-test.

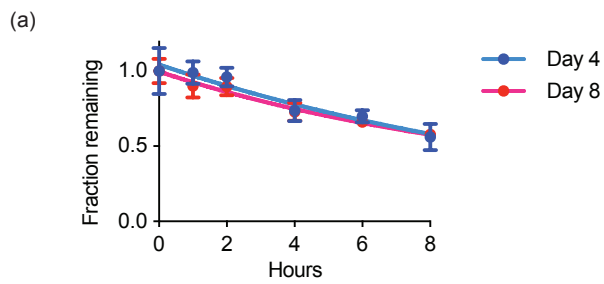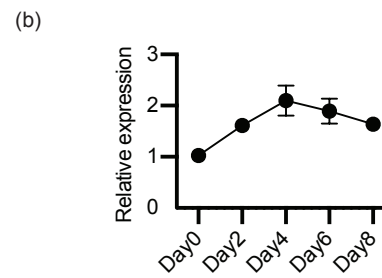

**Supplementary Fig. 9 The regulation of HuR expression during adipogenesis.**

Primary white preadipocytes were isolated from 3-week-old C57Bl6 mice for culture and then induced to differentiate for 8 days. (a) Actinomycin D was added to track the decay rate at day 4 and day 8. n=6. (b) Real-time PCR analysis of HuR expression at Day 0, 2, 4, 6 and 8. n=4 per group. Error bars are mean  $\pm$  SEM.
