# Supplementary material for: The RNA-binding protein HuR is a negative regulator in adipogenesis
Source: PubMed Central journal article supplement (PMC6954112; doi:10.1038/s41467-019-14001-8), 2020-01-10
Supplement: 41467_2019_14001_MOESM3_ESM.pdf [file 41467_2019_14001_MOESM3_ESM.pdf]

### **Description of Additional Supplementary Files**

**File name:** Supplementary Data 1

**Description:** qPCR Primer sequences.

**File name:** Supplementary Data 2

**Description:** Ribosome protected fragment from Control and FKO mice.

**File name:** Supplementary Data 3

**Description:** The gene expression of HuR targets

**File name:** Supplementary Data 4

**Description:** HuR immunoprecipitation followed by RNA sequencing.

**File name:** Supplementary Data 5

**Description:** AU-rich elements (ARE) presentation in HuR targets.

**File name:** Supplementary Data 6

**Description:** Oligos for cloning.
